# Supplementary material for: Learning, Accessing, and Choosing Cone Beam Computed Tomography: A Survey of Endodontists and Endodontic Specialty Students
Source: Research Square preprint supplement (doi:10.21203/rs.3.rs-8520727/v1), 2026-01-29
Supplement: Supplementary file 1 [file 1af3110d661fcfc735dc43ae.docx]

| **Items** | **Mean** | **Factor loading** | Cronbach’s α | Eigenvalue | Variance (%) |
| --- | --- | --- | --- | --- | --- |
| **A1: Use of CBCT in complicated cases** | **3.53** |  |  |  |  |
| I29. I use CBCT when perforation is suspected. | 3.53 | .772 | .90 | 4.64 | 17.83 |
| I14. I use CBCT in cases of internal and external resorption. | 3.92 | .767 |
| I16. I use CBCT in the presence of calcified or blocked canals. | 3.27 | .759 |
| I18. I use CBCT for patients with persistent symptoms following root canal treatment. | 3.33 | .741 |
| I15. I use CBCT when an extra canal is suspected. | 3.51 | .736 |
| I17. I use CBCT prior to endodontic surgery. | 3.62 | .519 |
| **A2: Measurement of proximity to adjacent anatomy and Use of CBCT in dental trauma** | **3.01** |  |  |  |  |
| I30. I use CBCT to evaluate the relationship between the roots of mandibular posterior teeth and the mandibular canal. | 3.01 | .870 | .82 | 3.03 | 11.66 |
| I26. I use CBCT to assess the relationship between the sinus and the root or apical lesion during maxillary tooth treatment. | 2.88 | .817 |
| I27. I use CBCT in cases of autotransplantation. | 3.17 | .615 |
| I24. I use CBCT in dentoalveolar and dental trauma cases. | 3.53 | .550 |
| I31. I use CBCT in diagnosing cracked tooth syndrome. | 2.48 | .550 |
| **A3: Use of CBCT in diagnosis and treatment planning** | **2.07** |  |  |  |  |
| I11. I use CBCT for every patient who requires root canal treatment. | 1.36 | .809 | .80 | 2.64 | 10.15 |
| I12. I use CBCT prior to root canal treatment. | 1.99 | .755 |
| I13. I use CBCT before retreatment. | 2.39 | .676 |
| I20. I use CBCT when a broken instrument is present. | 2.55 | .510 |
| **A4: Using CBCT for ideal imaging** | **3.94** |  |  |  |  |
| I7. Using CBCT enhances my treatment success by providing three-dimensional evaluation. | 4.32 | .757 | .76 | 2.51 | 9.67 |
| I8. When I use CBCT, the patient’s trust in me increases. | 3.49 | .709 |
| I1. Using CBCT shortens my treatment time by clarifying the treatment protocol. | 3.83 | .684 |
| I4. Using CBCT facilitates treatment planning by improving diagnostic quality. | 4.15 | .672 |
| **A5: Access to CBCT** | **3.71** |  |  |  |  |
| I2. I have difficulty accessing CBCT because the facility where I work does not have CBCT equipment. | 4.17 | .838 | .71 | 2.18 | 8.41 |
| I3. Due to insufficient space in the clinic for CBCT use, I refer patients to radiology centres or other units. | 3.65 | .756 |
| I5. Patients often do not prefer CBCT due to its cost. | 3.34 | .690 |
| **A6: Use of CBCT according to lesion size** | **3.74** |  |  |  |  |
| I22. I use CBCT in cases where the lesion size involves up to three teeth. | 3.42 | .788 | .78 | 1.92 | 7.37 |
| I23. I use CBCT in cases where the lesion size involves up to five teeth. | 4.07 | .699 |
| Keiser-Meyer-Olkin Measure of Sampling Adequacy: .88  Bartlett’s Test of Sphericity :  2305.012  p* < .05 | | | | | |
