# Supplementary material for: Learning, Accessing, and Choosing Cone Beam Computed Tomography: A Survey of Endodontists and Endodontic Specialty Students
Source: Research Square preprint supplement (doi:10.21203/rs.3.rs-8520727/v1), 2026-01-29
Supplement: Supplementary file 3 [file 56b6aa2f3d1b8a0164be45b0.docx]

| **Independent variables** | **Groups** | **N** | | **%** |
| --- | --- | --- | --- | --- |
| Gender | Female | 111 | 64.5 | |
| Male | 61 | 35.5 | |
| Title | Specialty/Doctoral Student | 41 | 23.8 | |
| Completed Specialty/Doctoral Training | 79 | 45.9 | |
| Assist. Prof. Dr. | 22 | 12.8 | |
| Assoc. Prof. Dr. | 17 | 9.9 | |
| Prof. Dr. | 13 | 7.6 | |
| Years of professional experience | 5 years or less | 88 | 51.2 | |
| 6-11 years | 39 | 22.7 | |
| 12 years or more | 43 | 25.0 | |
| Missing data | 2 | 1.2 | |
| Type of institution of employment | University hospital | 126 | 73.3 | |
| Private clinic or office | 35 | 20.3 | |
| Oral and dental health centre | 11 | 6.4 | |
| Current CBCT usage status | I use it | 144 | 83.7 | |
| I don't use it | 28 | 16.3 | |
| Receiving training in CBCT usage | Yes, I received training | 83 | 48.3 | |
| No, I did not receive training | 89 | 51.7 | |
| Learned knowledge tool for CBCT interpretation | Specialist training | 71 | In first place | |
| Scientific articles and publications | 45 | In second place | |
| Vocational courses | 28 | In third place | |
| Congress participation | 27 | In fourth place | |
| Undergraduate education | 25 | In fifth place | |
| Social media | 14 | In sixth place | |
| CBCT: Cone Beam Computed Tomography | |  |  | |
