# Supplementary material for: Learning, Accessing, and Choosing Cone Beam Computed Tomography: A Survey of Endodontists and Endodontic Specialty Students
Source: Research Square preprint supplement (doi:10.21203/rs.3.rs-8520727/v1), 2026-01-29
Supplement: Supplementary file 4 [file 64020360f9497d23066ca18a.docx]

| **Factors** | **CBCT usage** | **N** | **Mean Rank** | **U** | **p** |
| --- | --- | --- | --- | --- | --- |
| A1 | I use it. | 144 | 92.93 | 1090.000 | .000* |
| I do not use it. | 28 | 53.43 |
| A2 | I use it. | 144 | 91.11 | 1351.500 | .006* |
| I do not use it. | 28 | 62.77 |
| A3 | I use it. | 144 | 89.86 | 1531.500 | .043* |
| I do not use it. | 28 | 69.20 |
| A4 | I use it. | 144 | 89.31 | 1612.000 | .092 |
| I do not use it. | 28 | 72.07 |
| A5 | I use it. | 144 | 95.81 | 675.000 | .000* |
| I do not use it. | 28 | 38.61 |
| A6 | I use it. | 144 | 91.60 | 1282.000 | .002* |
| I do not use it. | 28 | 60.29 |
| A1: Use of CBCT in complicated cases; A2: Measurement of proximity to adjacent anatomy and use of CBCT in dental trauma; A3: Use of CBCT in diagnosis and treatment planning; A4: Use of CBCT for ideal imaging; A5: Access to CBCT; A6: Use of CBCT according to lesion size; p*<0.05 | | | | | |
