# Supplementary material for: Learning, Accessing, and Choosing Cone Beam Computed Tomography: A Survey of Endodontists and Endodontic Specialty Students
Source: Research Square preprint supplement (doi:10.21203/rs.3.rs-8520727/v1), 2026-01-29
Supplement: Supplementary file 5 [file 7d4f84976d76f6fa877158d0.docx]

| **Fit Indexes** | **Good Fit** | **Acceptable Fit** |
| --- | --- | --- |
| *X2/sd* | ​​0≤ ​*X2/sd*​≤2​ | 2<*X2/sd*​≤3​ |
| GFI | ​​0,95≤​*GFI*​≤1,00​ | ​​0,90≤​*GFI*​≤0,95​ |
| CFI | ​​0,97≤​*CFI*​≤1,00​ | ​​0,95≤​*CFI*<0,97 |
| NFI | ​​0,95≤​*NFI*​≤1,00​ | ​​0,90≤​*NFI*<0,95 |
| AGFI | ​​0,90≤​*AGFI*​≤1,00​ | ​​*0,85≤AGFI<0,90*​ |
| RMSEA | ​​*0≤RMSEA≤0,05*​ | ​​*0,05<RMSEA ≤0,08*​ |
| SRMR | ​​*0≤SRMR≤0,05*​ | ​​*0,05≤SRMR≤0,10*​ |

**Source:** Schermelleh-Engel, K., Moosbrugger, H., & Müller, H. (2003). Evaluating the fit of structural equation models: Tests of significance and descriptive goodness-of-fit measures. Methods of Psychological Research Online, 8(2), 23–74
