# Supplementary material for: Learning, Accessing, and Choosing Cone Beam Computed Tomography: A Survey of Endodontists and Endodontic Specialty Students
Source: Research Square preprint supplement (doi:10.21203/rs.3.rs-8520727/v1), 2026-01-29
Supplement: Supplementary file 6 [file 95858ba691227e825d68539f.docx]

| **Factors** | **Professional Seniority** | **N** | 𝑥̄ | **SD** | **F** | **p** | **Significant Difference** |
| --- | --- | --- | --- | --- | --- | --- | --- |
| A1 | 5 years or less | 88 | 3.45 | .96 | .889 | .413 | - |
| 6-11 years | 39 | 3.67 | .92 |
| 12 years or more | 43 | 3,62 | 1.08 |
| A2 | 5 years or less | 88 | 3.03 | .93 | 1.546 | .216 | - |
| 6-11 years | 39 | 3.22 | .99 |
| 12 years or more | 43 | 2.82 | 1.15 |
| A3 | 5 years or less | 88 | 1.96 | .71 | 1.837 | .163 | - |
| 6-11 years | 39 | 2.2 | .87 |
| 12 years or more | 43 | 2.2 | .96 |
| A4 | 5 years or less | 88 | 4.02 | .66 | 1.103 | .334 | – |
| 6-11 years | 39 | 3.97 | .78 |
| 12 years or more | 43 | 3.82 | .86 |
| A5 | 5 years or less | 88 | 3.58 | 1.09 | 1.563 | .213 | – |
| 6-11 years | 39 | 3.76 | 1.01 |
| 12 years or more | 43 | 3.93 | 1.07 |
| A6 | 5 years or less | 88 | 3.72 | 1.06 | .286 | .752 | **-** |
| 6-11 years | 39 | 3.85 | 1.07 |
| 12 years or more | 43 | 3.82 | .96 |
| A1: Use of CBCT in complicated cases; A2: Measurement of proximity to adjacent anatomy and use of CBCT in dental trauma; A3: Use of CBCT in diagnosis and treatment planning; A4: Use of CBCT for ideal imaging; A5: Access to CBCT; A6: Use of CBCT according to lesion size; p*<0.05 | | | | | | | |
