# Supplementary material for: Learning, Accessing, and Choosing Cone Beam Computed Tomography: A Survey of Endodontists and Endodontic Specialty Students
Source: Research Square preprint supplement (doi:10.21203/rs.3.rs-8520727/v1), 2026-01-29
Supplement: Supplementary file 7 [file a0fd61f51096075fe19fe511.docx]

Table 4. Discriminant Validity Matrix Based on the Fornell–Larcker Criterion

| **Construct** | **√AVE** | A1 | A2 | A3 | A4 | A5 | A6 | Results |
| --- | --- | --- | --- | --- | --- | --- | --- | --- |
| A1. Use of CBCT in complicated cases | **.77** | **.77** |  |  |  |  |  | Discriminant validity was established. |
| A2. Measurement of proximity to adjacent anatomy and use of CBCT in dental trauma |  | .57 | **.71** |  |  |  |  | Established |
| A3. Use of CBCT in diagnosis and treatment planning |  | .52 | .54 | **.73** |  |  |  | Established |
| A4. Use of CBCT for ideal imaging |  | .51 | .40 | .36 | **.67** |  |  | Established |
| A5. Access to CBCT |  | .34 | .12 | .23 | .05 | **.70** |  | Established |
| A6. Use of CBCT according to lesion size |  | .55 | .45 | .32 | .46 | .02 | **.81** | Established |
| Note. Diagonal elements (in bold) represent the square roots of AVE, and the off-diagonal elements represent the inter-construct correlations. Values along the diagonal being higher than corresponding correlations indicate satisfactory discriminant validity. | | | | | | | | |
