# Supplementary material for: Learning, Accessing, and Choosing Cone Beam Computed Tomography: A Survey of Endodontists and Endodontic Specialty Students
Source: Research Square preprint supplement (doi:10.21203/rs.3.rs-8520727/v1), 2026-01-29
Supplement: Supplementary file 8 [file d7270afbcd93f9e843b76ae4.docx]

| **Factors** | **Receiving training** | **N** | 𝑥̄ | **SD** | **df** | **t** | **p** |
| --- | --- | --- | --- | --- | --- | --- | --- |
| A1 | Yes, I received training | 83 | 3.62 | .92 | 170 | 1.171 | .243 |
| No, I did not receive training | 89 | 3.45 | 1.04 |
| A2 | Yes, I received training | 83 | 3.24 | 1.01 | 170 | 2.902 | .004* |
| No, I did not receive training | 89 | 2.80 | .97 |
| A3 | Yes, I received training | 83 | 2.14 | .85 | 170 | 1.109 | .269 |
| No, I did not receive training | 89 | 2.00 | .78 |
| A4 | Yes, I received training | 83 | 4.03 | .73 | 170 | 1.301 | .195 |
| No, I did not receive training | 89 | 3.88 | .77 |
| A5 | Yes, I received training | 83 | 3.7 | 1.09 | 170 | -.309 | .758 |
| No, I did not receive training | 89 | 3.74 | 1.06 |
| A6 | Yes, I received training | 83 | 3.92 | .98 | 170 | 2.051 | .042* |
| No, I did not receive training | 89 | 3.59 | 1.09 |
| A1: Use of CBCT in complicated cases; A2: Measurement of proximity to adjacent anatomy and use of CBCT in dental trauma; A3: Use of CBCT in diagnosis and treatment planning; A4: Use of CBCT for ideal imaging; A5: Access to CBCT; A6: Use of CBCT according to lesion size; p*<0.05 | | | | | | | |
