# Supplementary material for: Learning, Accessing, and Choosing Cone Beam Computed Tomography: A Survey of Endodontists and Endodontic Specialty Students
Source: Research Square preprint supplement (doi:10.21203/rs.3.rs-8520727/v1), 2026-01-29
Supplement: Supplementary file 9 [file d9251ff6360d1c451c8d98ad.docx]

| **Factors** | **Gender** | **N** | 𝑥̄ | **SD** | **df** | **t** | **p** |
| --- | --- | --- | --- | --- | --- | --- | --- |
| A1 | Female | 111 | 3.61 | .92 | 170 | 1.326 | .187 |
| Male | 61 | 3.40 | 1.09 |
| A2 | Female | 111 | 3.11 | .93 | 170 | 1.627 | .107 |
| Male | 61 | 2.84 | 1.12 |
| A3 | Female | 111 | 2.00 | .73 | 170 | -1.374 | .171 |
| Male | 61 | 2.19 | .95 |
| A4 | Female | 111 | 3.89 | .72 | 170 | -1.440 | .152 |
| Male | 61 | 4.06 | .82 |
| A5 | Female | 111 | 3.68 | 1.11 | 170 | -.531 | .596 |
| Male | 61 | 3.78 | 1.01 |
| A6 | Female | 111 | 3.80 | 1.02 | 170 | -.531 | .596 |
| Male | 61 | 3.65 | 1.10 |
| A1: Use of CBCT in complicated cases; A2: Measurement of proximity to adjacent anatomy and use of CBCT in dental trauma; A3: Use of CBCT in diagnosis and treatment planning; A4: Use of CBCT for ideal imaging; A5: Access to CBCT; A6: Use of CBCT according to lesion size; p*<0.05 | | | | | | | |
