# Supplementary material for: Learning, Accessing, and Choosing Cone Beam Computed Tomography: A Survey of Endodontists and Endodontic Specialty Students
Source: Research Square preprint supplement (doi:10.21203/rs.3.rs-8520727/v1), 2026-01-29
Supplement: Supplementary file 10 [file dcf23047129e6a3114683763.docx]

| Factors | **Title** | **N** | **Mean Rank** | | **χ²** | | **p** | | **Significant difference** | |
| --- | --- | --- | --- | --- | --- | --- | --- | --- | --- | --- |
| A1 | Prof. Dr. | 13 | 83.15 | 5.774 | | .217 | | - | |
| Assoc. Prof. Dr. | 17 | 110.41 |
| Assist. Prof. Dr. | 22 | 90.14 |
| Completed Specialty/Doctoral Training | 41 | 76.51 |
| Specialty/Doctoral Student | 79 | 86.08 |
| A2 | Prof. Dr. | 13 | 59.27 | 4.293 | | .368 | | - | |
| Assoc. Prof. Dr. | 17 | 89.91 |
| Assist. Prof. Dr. | 22 | 86.70 |
| Completed Specialty/Doctoral Training | 41 | 88.02 |
| Specialty/Doctoral Student | 79 | 89.40 |
| A3 | Prof. Dr. | 13 | 74.23 | 3.725 | | .445 | | - | |
| Assoc. Prof. Dr. | 17 | 104.71 |
| Assist. Prof. Dr. | 22 | 78.32 |
| Completed Specialty/Doctoral Training | 41 | 87.37 |
| Specialty/Doctoral Student | 79 | 86.43 |
| A4 | Prof. Dr. | 13 | 72.77 | 6.275 | | .180 | | - | |
| Assoc. Prof. Dr. | 17 | 64.44 |
| Assist. Prof. Dr. | 22 | 95.18 |
| Completed Specialty/Doctoral Training | 41 | 84.02 |
| Specialty/Doctoral Student | 79 | 92.37 |
| A5 | Prof. Dr. | 13 | 89.19 | 8.941 | | .063 | | - | |
| Assoc. Prof. Dr. | 17 | 111.24 |
| Assist. Prof. Dr. | 22 | 83.57 |
| Completed Specialty/Doctoral Training | 41 | 70.65 |
| Specialty/Doctoral Student | 79 | 89.78 |
| A6 | Prof. Dr. | 13 | 57.15 | 8.591 | | .072 | | **-** | |
| Assoc. Prof. Dr. | 17 | 97.32 |
| Assist. Prof. Dr. | 22 | 101.32 |
| Completed Specialty/Doctoral Training | 41 | 78.99 |  | |  | |  | |
| Specialty/Doctoral Student | 79 | 88.77 |  | |  | |  | |
| A1: Use of CBCT in complicated cases; A2: Measurement of proximity to adjacent anatomy and use of CBCT in dental trauma; A3: Use of CBCT in diagnosis and treatment planning; A4: Use of CBCT for ideal imaging; A5: Access to CBCT; A6: Use of CBCT according to lesion size; p*<0.05 | | | | | | | | | |
