# Supplementary material for: Learning, Accessing, and Choosing Cone Beam Computed Tomography: A Survey of Endodontists and Endodontic Specialty Students
Source: Research Square preprint supplement (doi:10.21203/rs.3.rs-8520727/v1), 2026-01-29
Supplement: Supplementary file 11 [file f2bed6840156a5a1093fe9fd.docx]

**Table 3.** The Pearson Product-Moment Correlation Coefficients of the CBCT Scale

|  | Factors | Alpha | Mean(ss) | CR | AVE | A1 | A2 | A3 | A4 | A5 | A6 |
| --- | --- | --- | --- | --- | --- | --- | --- | --- | --- | --- | --- |
| 1 | A1 | .90 | 3.53(.99) | .89 | .59 | 1 | ,574** | ,515** | ,509** | ,336** | ,547** |
| 2 | A2 | .82 | 3.01(1.01) | .83 | .51 |  | 1 | ,540** | ,403** | ,116 | ,451** |
| 3 | A3 | .80 | 2.07(.82) | .81 | .53 |  |  | 1 | ,362** | ,229** | ,319** |
| 4 | A4 | .76 | 3.95(.76) | .77 | .45 |  |  |  | 1 | ,049 | ,458** |
| 5 | A5 | .71 | 3.71(1.07) | .74 | .49 |  |  |  |  | 1 | ,024 |
| 6 | A6 | .78 | 3.74(1.05) | .79 | .65 |  |  |  |  |  | 1 |
| Note. **: p < .01; *: p < .05; CBCT-ASAU: Attitude scale towards accessibility and use of Cone Beam Computed Tomography; A1: Use of CBCT in complicated cases; A2: Measurement of proximity to adjacent anatomy and use of CBCT in dental trauma; A3: Use of CBCT in diagnosis and treatment planning; A4: Use of CBCT for ideal imaging; A5: Access to CBCT; A6: Use of CBCT according to lesion size | | | | | | | | | | | |
